# Supplementary material for: Prokayrotic Ubiquitin-Like Protein (Pup) Proteome of Mycobacterium tuberculosis
Source: PubMed Central journal article supplement (PMC2797603; doi:10.1371/journal.pone.0008589), 2010-01-06

Festa et al Fig. S1

|       |             |
|-------|-------------|
| Lane: | Strain:     |
| W     | WT          |
| P     | <i>pafA</i> |
| M     | <i>mpa</i>  |

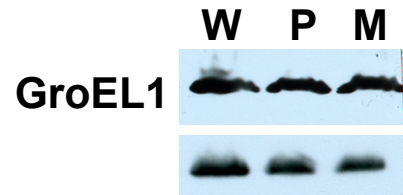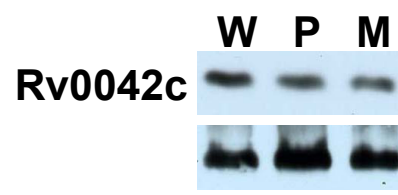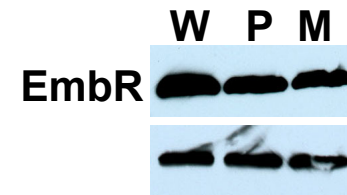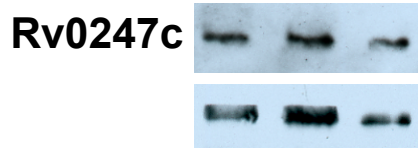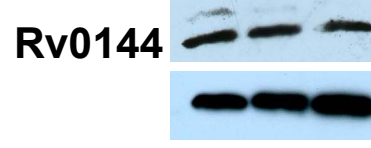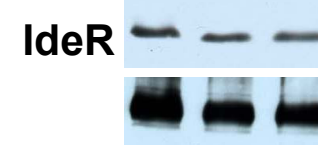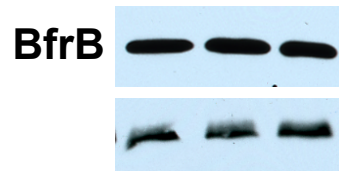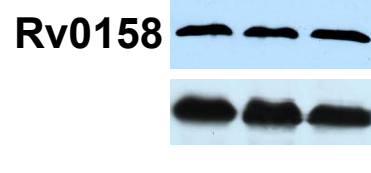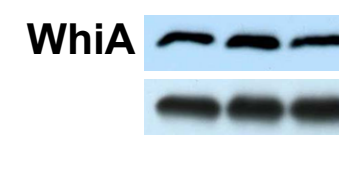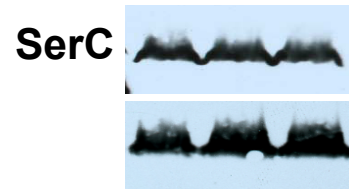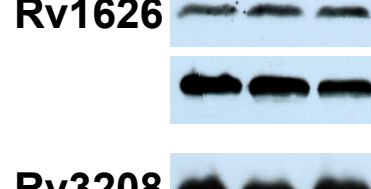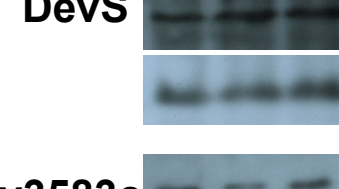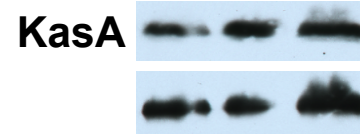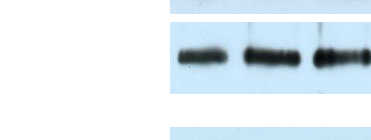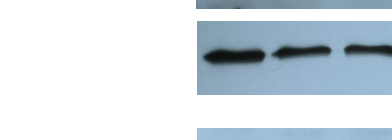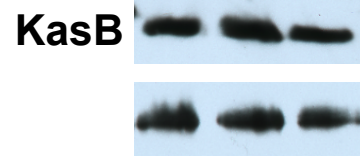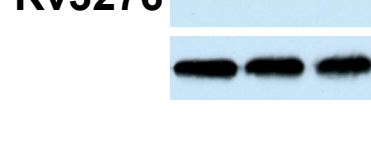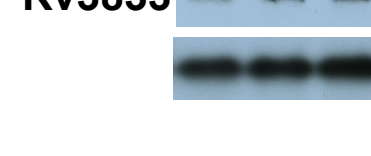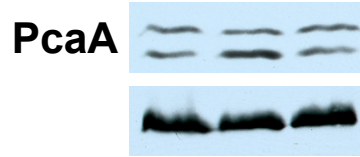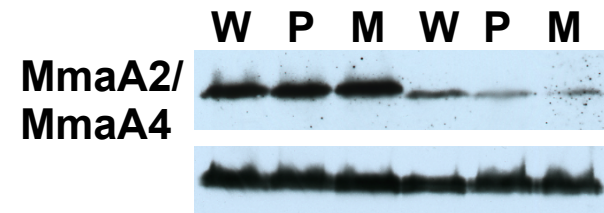

Supplement: pone.0008589.s001.pdf [file pone.0008589.s001.pdf]
